# Supplementary material for: Highly parallelized laboratory evolution of wine yeasts for enhanced metabolic phenotypes
Source: PubMed Central journal article supplement (PMC11450223; doi:10.1038/s44320-024-00059-0), 2024-08-22
Supplement: 44320_2024_59_MOESM1_ESM.pdf [file 44320_2024_59_MOESM1_ESM.pdf]

# Appendix for:

## Highly parallelized laboratory evolution of wine yeasts for enhanced metabolic phenotypes

Payam Ghiaci, Paula Jouhten, Nikolay Martyushenko, Helena Roca-Mesa, Jennifer Vázquez, Dimitrios Konstantinidis, Simon Stenberg, Sergej Andrejev, Kristina Grkovska, Albert Mas, Gemma Beltran, Eivind Almaas, Kiran R. Patil, Jonas Warringer

Corresponding authors: [jonas.warringer@cmb.gu.se](mailto:jonas.warringer@cmb.gu.se), [eivind.almaas@ntnu.no](mailto:eivind.almaas@ntnu.no), [kp533@cam.ac.uk](mailto:kp533@cam.ac.uk)

### Table of contents:

|                    |            |
|--------------------|------------|
| Appendix Table S1  | page 2-7   |
| Appendix Table S2  | page 8-11  |
| Appendix Table S3  | page 12-14 |
| Appendix Table S4  | page 15    |
| Appendix Table S5  | page 16-17 |
| Appendix Table S6  | page 18    |
| Appendix Figure S1 | page 19    |
| Appendix Figure S2 | page 20    |
| Appendix Figure S3 | page 21    |
| Appendix Figure S4 | page 22    |
| Appendix Figure S5 | page 23    |
| Appendix Figure S6 | page 24    |

**Appendix Table S1. Strains used in the study.** Wine yeasts = commercial wine yeasts owned or marketed by Lallemand Inc (Canada). Vineyard yeasts = natural, non-commercialized vineyard yeasts; from grapes or vineyard soil in the DOQ Priorat wine-making region in Catalonia, and identified as *S. cerevisiae* using restriction fragment length polymorphisms.

| Name   | Labelled as | Type                   | Description                                                                                                       | Heterozygosity ratio <sup>a</sup> |
|--------|-------------|------------------------|-------------------------------------------------------------------------------------------------------------------|-----------------------------------|
| L 71B  | E1          | Commercial wine yeasts | Lalvin 71B <sup>®</sup> . Isolated by INRA-Narbonne (France)                                                      | 0.10                              |
| L CLOS | E2          | Commercial wine yeasts | Lalvin CLOS <sup>®</sup> . Isolated by URV in DOQ Priorat wine region (Spain)                                     | 0.10                              |
| L QA23 | E3          | Commercial wine yeasts | Lalvin QA23 <sup>®</sup> . Isolated by UTAD in Vinhos verdes wine region (Portugal). <i>S. cerevisiae bayanus</i> | 0.25                              |
| LEC    | E4          | Commercial wine yeasts | Lalvin EC1118 <sup>®</sup> . Isolated in Champagne wine region (France). <i>S. cerevisiae bayanus</i>             | 0.52                              |
| L T73C | E5          | Commercial wine yeasts | Lalvin T73 <sup>®</sup> . Isolated by IATA-CSIC in DO Alicante wine region (Spain). <i>S. cerevisiae bayanus</i>  | 0.06                              |
| U VN   | E6          | Commercial wine yeasts | Uvaferm VN <sup>®</sup> . Isolated by IVICAM (Spain) in DO La Mancha wine region (Spain)                          | 0.25                              |
| U BC   | E7          | Commercial wine yeasts | Uvaferm BC <sup>®</sup> . Isolated by Institute Pasteur                                                           | 0.03                              |

|         |                     |                        |                                                                                                            |      |
|---------|---------------------|------------------------|------------------------------------------------------------------------------------------------------------|------|
|         |                     |                        | (France). <i>S. cerevisiae bayanus</i>                                                                     |      |
| U BDX   | E8                  | Commercial wine yeasts | Uvaferm BDX®. Isolated by U. Bordeaux (France)                                                             | 0.10 |
| U CS2   | E9<br>(Ctrl strain) | Commercial wine yeasts | Uvaferm CS2®. Used as the control strain throughout the phenotyping experiments.                           | 0.66 |
| U EXE   | E10                 | Commercial wine yeasts | Uvaferm EXENCE®. Isolated by IWB in Stellenbosch (South Africa), result of the crossing of two Sc strains. | 0.57 |
| U WAM   | E11                 | Commercial wine yeasts | Uvaferm WAM®. Isolated by U. Valladolid in DO Rueda wine region (Spain).                                   | 0.03 |
| U 43    | E12                 | Commercial wine yeasts | Uvaferm 43®. Isolated by Institute Inter Rhône (France). Fructophilic yeast. <i>S. cerevisiae bayanus</i>  | 0.28 |
| U CEG   | D12                 | Commercial wine yeasts | Uvaferm CEG®. Isolated by Geisenheim Research Station (Germany)                                            | 0.30 |
| V BMW58 | D11                 | Commercial wine yeasts | Velluto BMV58®. Isolated by IATA-CSIC in DO Valencia wine region (Spain). <i>S. uvarum</i>                 | ND   |

|                 |     |                        |                                                                                                                 |      |
|-----------------|-----|------------------------|-----------------------------------------------------------------------------------------------------------------|------|
| Cross Evolution | D10 | Commercial wine yeasts | Cross Evolution®. Selected by IWB in Stellenbosch (South Africa), result of the backcrossing of two Sc strains. | 0.33 |
| SL6             | G1  | Local cellar isolates  | Natural isolate from DOQ Priorat wine region (Ferrer-Bobet winery)                                              | 0.03 |
| SFB2            | G2  | Local cellar isolates  | Natural isolate from DOQ Priorat wine region (Ferrer-Bobet winery)                                              | 0.04 |
| SFB1            | G3  | Local cellar isolates  | Natural isolate from DOQ Priorat wine region (Ferrer-Bobet winery)                                              | 0.03 |
| SFB3            | G4  | Local cellar isolates  | Natural isolate from DOQ Priorat wine region (Ferrer-Bobet winery)                                              | 0.10 |
| SFB5            | G5  | Local cellar isolates  | Natural isolate from DOQ Priorat wine region (Ferrer-Bobet winery)                                              | 0.04 |
| SFB4            | G6  | Local cellar isolates  | Natural isolate from DOQ Priorat wine region (Ferrer-Bobet winery)                                              | 0.03 |
| SFB7            | G7  | Local cellar isolates  | Natural isolate from DOQ Priorat wine region (Ferrer-Bobet winery)                                              | 0.04 |
| SFB6            | G8  | Local cellar isolates  | Natural isolate from DOQ Priorat wine region (Ferrer-Bobet winery)                                              | 0.03 |

|       |     |                       |                                                                          |      |
|-------|-----|-----------------------|--------------------------------------------------------------------------|------|
| SFB10 | G9  | Local cellar isolates | Natural isolate from DOQ<br>Priorat wine region<br>(Ferrer-Bobet winery) | 0.26 |
| SFB9  | G10 | Local cellar isolates | Natural isolate from DOQ<br>Priorat wine region<br>(Ferrer-Bobet winery) | 0.22 |
| SFB8  | G11 | Local cellar isolates | Natural isolate from DOQ<br>Priorat wine region<br>(Ferrer-Bobet winery) | 0.04 |
| SL4   | G12 | Local cellar isolates | Natural isolate from DOQ<br>Priorat wine region<br>(Ferrer-Bobet winery) | 0.04 |
| SL3   | F12 | Local cellar isolates | Natural isolate from DOQ<br>Priorat wine region<br>(Ferrer-Bobet winery) | 0.02 |
| M2    | M2  | Local cellar isolates | Natural isolate from DOQ<br>Priorat wine region (Mas<br>Perinet winery)  | 0.14 |
| M3    | M3  | Local cellar isolates | Natural isolate from DOQ<br>Priorat wine region (Mas<br>Perinet winery)  | 0.11 |
| M4    | M4  | Local cellar isolates | Natural isolate from DOQ<br>Priorat wine region (Mas<br>Perinet winery)  | 0.26 |
| M5    | M5  | Local cellar isolates | Natural isolate from DOQ<br>Priorat wine region (Mas<br>Perinet winery)  | 0.03 |
| M6    | M6  | Local cellar isolates | Natural isolate from DOQ<br>Priorat wine region (Mas<br>Perinet winery)  | 0.03 |

|     |     |                       |                                                                   |      |
|-----|-----|-----------------------|-------------------------------------------------------------------|------|
| M7  | M7  | Local cellar isolates | Natural isolate from DOQ Priorat wine region (Mas Perinet winery) | 0.05 |
| M9  | M9  | Local cellar isolates | Natural isolate from DOQ Priorat wine region (Mas Perinet winery) | 0.03 |
| M10 | M10 | Local cellar isolates | Natural isolate from DOQ Priorat wine region (Mas Perinet winery) | 0.04 |
| M11 | M11 | Local cellar isolates | Natural isolate from DOQ Priorat wine region (Mas Perinet winery) | 0.19 |
| M12 | M12 | Local cellar isolates | Natural isolate from DOQ Priorat wine region (Mas Perinet winery) | 0.67 |
| M13 | M13 | Local cellar isolates | Natural isolate from DOQ Priorat wine region (Mas Perinet winery) | 0.12 |
| T3  | T3  | Local cellar isolates | Natural isolate from DO Terra Alta wine region                    | 0.04 |
| T4  | T4  | Local cellar isolates | Natural isolate from DO Terra Alta wine region                    | 0.03 |
| T5  | T5  | Local cellar isolates | Natural isolate from DO Terra Alta wine region                    | 0.03 |
| T6  | T6  | Local cellar isolates | Natural isolate from DO Terra Alta wine region                    | 0.03 |
| T7  | T7  | Local cellar isolates | Natural isolate from DO Terra Alta wine region                    | 0.03 |

|     |     |                       |                                                |      |
|-----|-----|-----------------------|------------------------------------------------|------|
| T8  | T8  | Local cellar isolates | Natural isolate from DO Terra Alta wine region | 0.03 |
| T14 | T14 | Local cellar isolates | Natural isolate from DO Terra Alta wine region | 0.05 |
| T15 | T15 | Local cellar isolates | Natural isolate from DO Terra Alta wine region | 0.03 |
| T19 | T19 | Local cellar isolates | Natural isolate from DO Terra Alta wine region | 0.02 |

<sup>a</sup> The heterozygosity ratio was calculated as the number of heterozygotic SNPs/ the number of homozygotic SNPs.

**Appendix Table S2. Description and rationale of ALE selection environments used in the study.**

| ALE selection  | Background                                                                                                                                                                                                                                                                                                                                                                                                                                                                                                                                                                                                                                                                                                                                                                                                                                                                                                                                                                                                          | Description & Rationale                                                                                                                                                                                                                                                                                                                                                                                                                                                                                                                                                                                                                                                                                                                                                                                           |
|----------------|---------------------------------------------------------------------------------------------------------------------------------------------------------------------------------------------------------------------------------------------------------------------------------------------------------------------------------------------------------------------------------------------------------------------------------------------------------------------------------------------------------------------------------------------------------------------------------------------------------------------------------------------------------------------------------------------------------------------------------------------------------------------------------------------------------------------------------------------------------------------------------------------------------------------------------------------------------------------------------------------------------------------|-------------------------------------------------------------------------------------------------------------------------------------------------------------------------------------------------------------------------------------------------------------------------------------------------------------------------------------------------------------------------------------------------------------------------------------------------------------------------------------------------------------------------------------------------------------------------------------------------------------------------------------------------------------------------------------------------------------------------------------------------------------------------------------------------------------------|
| NCR relaxation | <p><i>S. cerevisiae</i> use of organic nitrogen sources common in grape must (proline, arginine) is often repressed by the presence of inorganic ammonium. Ammonium stimulates the nitrogen catabolite repression system (NCR), which transcriptionally and post-transcriptionally represses genes required for uptake and catabolism of e.g. proline and arginine. Incomplete use of these nitrogen sources leads to stuck fermentations, inability to consume all sugar and invasion of the must by spoiling microorganisms<sup>107</sup>. Amines (RCH<sub>2</sub>NH<sub>2</sub>), such as methylamine, likewise stimulates NCR and represses proline and arginine use. <i>Saccharomyces cerevisiae</i> lacks the amine oxidases <i>AMO1</i> and <i>AMO2</i> and is therefore not capable of using methylated amines as nitrogen sources<sup>108, 109</sup>. Methylamine therefore suppresses the use of proline and arginine by activating NCR but does provide the nitrogen that yeast requires for growth.</p> | <p>Select evolving populations on a synthetic grape must medium that only contains arginine and proline as nitrogen sources (15 mg/L each) and where use of arginine and proline is heavily repressed by the presence of methylamine (10 g/L). We expect a subset of populations to adapt by reducing the activation of NCR by methylamine, allowing yeast to better use arginine and proline to support growth. Because of the interconnectivity of intracellular nitrogen metabolite pools, we also expect increased flow through the proline and arginine catabolism systems to spill over into higher flows through other nitrogen metabolic pathways, such as those involving branched chain amino acids. This may result in increased production of aroma compounds, and enhanced wine taste and smell.</p> |



|                        |                                                                                                                                                                                                                                                                                                                                                                                                                                                                                                                                                                                               |                                                                                                                                                                                                                                                                                                                                                                                                                                                                                                                                                                                                                                 |
|------------------------|-----------------------------------------------------------------------------------------------------------------------------------------------------------------------------------------------------------------------------------------------------------------------------------------------------------------------------------------------------------------------------------------------------------------------------------------------------------------------------------------------------------------------------------------------------------------------------------------------|---------------------------------------------------------------------------------------------------------------------------------------------------------------------------------------------------------------------------------------------------------------------------------------------------------------------------------------------------------------------------------------------------------------------------------------------------------------------------------------------------------------------------------------------------------------------------------------------------------------------------------|
| GR relaxation          | <p><i>S. cerevisiae</i> often use fructose in grape must less well in the presence of glucose. Incomplete use of fructose often leads to stuck fermentations, inability to consume all sugar and invasion of the must by spoiling microorganisms<sup>110</sup>. 2-deoxy-D-glucose, which has the 2-hydroxyl group replaced by hydrogen, possess many of the properties of glucose, but because it competitively inhibits the production of glucose-6-phosphate<sup>111</sup>, it cannot undergo glycolysis and cannot be used carbon or energy source by <i>Saccharomyces cerevisiae</i>.</p> | <p>Select evolving populations on a synthetic grape must medium that only contains fructose as carbon source and where use of fructose is disfavoured due to the presence of 2-deoxy-D-glucose (2g/L). We expect a subset of populations to adapt by relaxation of glucose repression, allowing earlier and faster use of fructose. Such strains will be particularly useful for re-starting fermentations that have stuck due to incomplete use of fructose.</p>                                                                                                                                                               |
| Glutathione production | <p>Glutathione prevents oxidation of wine but is rarely present in notable concentrations in grape must. Yeast produces glutathione from glutamate, cysteine and glycine in a two-step reaction catalyzed by <i>GSH1</i> and <i>GSH2</i> and can be excreted<sup>112</sup>. The intracellular demand for, and production of glutathione, increases heavily under oxidizing conditions imposed by addition of the oxidizing agent diamide<sup>113</sup>.</p>                                                                                                                                   | <p>Select evolving populations on a synthetic grape must medium only containing glutamate, cysteine and glycine (equal proportions; standard amounts of nitrogen retained 140 mg N/L) as nitrogen sources, increasing their intracellular pools and the flow through glutathione biosynthesis. Diamide is added at growth limiting concentrations (1.5 mM) to simultaneously increase demand for high intracellular glutathione levels. We expect a subset of populations to adapt by mutations that directly (e.g. glutathione biosynthesis) or indirectly (e.g. precursor uptake) increase net production of glutathione.</p> |

|                          |                                                                                                                                                                                                                                                                                                                                                                                                                                                                                                                                                                                                                                                                                                                                                                                                                                                                |                                                                                                                                                                                                                                                                                                                                                                                          |
|--------------------------|----------------------------------------------------------------------------------------------------------------------------------------------------------------------------------------------------------------------------------------------------------------------------------------------------------------------------------------------------------------------------------------------------------------------------------------------------------------------------------------------------------------------------------------------------------------------------------------------------------------------------------------------------------------------------------------------------------------------------------------------------------------------------------------------------------------------------------------------------------------|------------------------------------------------------------------------------------------------------------------------------------------------------------------------------------------------------------------------------------------------------------------------------------------------------------------------------------------------------------------------------------------|
| <p>Aroma production</p>  | <p>Wine aroma compounds, e.g. fusel alcohols, produced by wine yeasts are bio-synthesized via pathways, e.g. the Ehrlich pathway<sup>114</sup>, originating in the intracellular pools of branched chain amino acids, such as isoleucine, phenylalanine and valine.</p>                                                                                                                                                                                                                                                                                                                                                                                                                                                                                                                                                                                        | <p>Select evolving populations on a synthetic grape must medium that only contains isoleucine, phenylalanine and valine (equal proportions; standard amount of nitrogen retained) as nitrogen sources. We expect a subset of populations to adapt by mutations that directly (e.g. the Ehrlich pathway) or indirectly (e.g. BCAA uptake) increases the production of fusel alcohols.</p> |
| <p>Ethanol tolerance</p> | <p>Due to climate change, the sugar content of grapes creeps upwards. Because, yeast ferments sugar to ethanol, so do the ethanol content of wine. To avoid stuck fermentations, sugar left in the wine, and wine spoilage, this demands wine yeast capable of growth and fermentation at high concentrations of ethanol. The need is particularly pronounced for sparkling wine, which is produced by two serial fermentations of grape must. The second fermentation is initiated by inoculating yeast into wine already high in ethanol content, exposing the yeast to an ethanol shock unless it is pre-adapted <sup>115</sup>. Ethanol is volatile and evaporates under open environment selection experiments. Less volatile alcohols, such as 1-butanol (bp 118 C vs. 78 C of EtOH), have cellular effects that mimic those of ethanol, and strains</p> | <p>Select evolving populations on a synthetic grape must medium supplemented by growth limiting (1.3 % v/v) concentrations of 1-butanol. We expect a subset of populations to adapt by increasing their tolerance to alcohols in general, including to ethanol.</p>                                                                                                                      |

|                     |                                                                                                                                                                                                                                                                                                                                                                                                                                            |                                                                                                                                                                                                                                                                                                                                                         |
|---------------------|--------------------------------------------------------------------------------------------------------------------------------------------------------------------------------------------------------------------------------------------------------------------------------------------------------------------------------------------------------------------------------------------------------------------------------------------|---------------------------------------------------------------------------------------------------------------------------------------------------------------------------------------------------------------------------------------------------------------------------------------------------------------------------------------------------------|
|                     | resistant to 1-butanol tend to be resistant to ethanol.                                                                                                                                                                                                                                                                                                                                                                                    |                                                                                                                                                                                                                                                                                                                                                         |
| Sugar tolerance     | Due to climate change, the sugar content of grapes creeps upwards <sup>116</sup> . High sugar content exposes yeast to osmotic and ethanol stress and affects sugar uptake by emphasizing the importance of low affinity hexose transporters.                                                                                                                                                                                              | Select evolving populations on a synthetic grape must medium with high (35 %; standard proportions of glucose and fructose retained) sugar concentrations. We expect some populations to adapt by increasing their tolerance to osmotic and ethanol stress, and to be able to take up sugar faster and more efficiently at higher sugar concentrations. |
| Vitamin starvation  | Vitamins are required for yeast growth and metabolism because of their roles as enzymatic cofactors. In many grape musts, access to vitamins constrains yeast growth and metabolism lead to stuck fermentation, sugar and nitrogen left in the medium, and wine spoilage <sup>107</sup> . The problem is exacerbated by climate change, which leads to faster grape maturation and lower vitamin content of mature grapes <sup>117</sup> . | Select evolving populations on a synthetic grape must medium poor in vitamins (1 % of normal; standard proportions retained). We expect some populations to adapt by increasing their capacity to grow and metabolize at low vitamin concentrations.                                                                                                    |
| Nitrogen starvation | Grape must is often rich in carbon, but poor in nitrogen, leading to nitrogen starved yeast, stuck fermentations, sugar left in the wine and wine spoilage <sup>118</sup> .                                                                                                                                                                                                                                                                | Select evolving populations on a synthetic grape must medium poor in nitrogen (10 % of normal; standard proportions retained). We expect some populations to adapt by increasing their capacity to grow and metabolize at low nitrogen concentrations.                                                                                                  |

**Appendix Table S3. Growth medium composition for each ALE selection and side-effect environments.** Synthetic grape must<sup>34</sup> was the background media throughout all the experiments.

| Abbreviation | Description                                                                                                            | ALE selection          | Side-effect environment |
|--------------|------------------------------------------------------------------------------------------------------------------------|------------------------|-------------------------|
| S-NCR        | SGM adjusted as [arginine (15 mg N/l) + proline (15 mg N/l)] as sole N sources + 1% Methyl amine                       | NCR relaxation         |                         |
| S-GR         | SGM adjusted as 20% Fru. + 2-deoxy glucose (0.2 g/100 ml)                                                              | GR relaxation          |                         |
| S-Gluth      | SGM adjusted as [Glycine (47 mg N/l) + Glutamine (47 mg N/l) + Cysteine (47 mg N/l)] as sole N source + 1.5 mM Diamide | Glutathione production |                         |
| S-Aroma      | SGM adjusted as [Valine (10 mg N/l) + Iso-leucine (10 mg N/l) + Phenylalanine (10 mg N/l)] as sole N sources           | Aroma production       |                         |
| S-But        | SGM + 1.3% 1-butanol (v/v)                                                                                             | Ethanol tolerance      |                         |
| S-35Sug      | SGM adjusted as 17.5% Glu. + 17.5% Fru as C source                                                                     | Sugar tolerance        |                         |
| S-Vit        | SGM adjusted as 1% of normal vitamin concentration                                                                     | Vitamin starvation     |                         |
| S-Nit        | SGM adjusted as 10% of normal amino acid concentration                                                                 | Nitrogen starvation    |                         |
| S-40Sug      | SGM adjusted as 20% Glu. + 20% Fru as C source                                                                         | ---                    | C utilization           |
| S-Fru        | SGM adjusted as 20% Fructose as a C source                                                                             | ---                    | C utilization           |

|        |                                                         |     |               |
|--------|---------------------------------------------------------|-----|---------------|
| S-Lac  | SGM adjusted as 2% Lactose as a C source                | --- | C utilization |
| S-Mal  | SGM adjusted as 2% Maltose as a C source                | --- | C utilization |
| S-Man  | SGM adjusted as 2% Mannose as a C source                | --- | C utilization |
| S-Raf  | SGM adjusted as 2% Raffinose as a C source              | --- | C utilization |
| S-Gly  | SGM adjusted as 2% Glycerol as a C source               | --- | C utilization |
| S-Gal  | SGM adjusted as 2% Galactose as a C source              | --- | C utilization |
| S-Ala  | SGM adjusted as Alanine (mg N/l) as sole N source       | --- | N utilization |
| S-Asp  | SGM adjusted as Aspartic acid (mg N/l) as sole N source | --- | N utilization |
| S-Glt  | SGM adjusted as Glutamine (mg N/l) as sole N source     | --- | N utilization |
| S-Glyc | SGM adjusted as Glycine (mg N/l) as sole N source       | --- | N utilization |
| S-GABA | SGM adjusted as GABA (mg N/l) as sole N source          | --- | N utilization |
| S-Met  | SGM adjusted as Methionine (mg N/l) as sole N source    | --- | N utilization |
| S-Pro  | SGM adjusted as Proline (mg N/l) as sole N source       | --- | N utilization |
| S-Phe  | SGM adjusted as Phenylalanine (mg N/l) as sole N source | --- | N utilization |

|        |                                                  |     |               |
|--------|--------------------------------------------------|-----|---------------|
| S-Urea | SGM adjusted as Urea (mg N/l) as sole N source   | --- | N utilization |
| S-Val  | SGM adjusted as Valine (mg N/l) as sole N source | --- | N utilization |

**Appendix Table S4. List of strains used in validations at semi-industrial fermentation of grape musts.**

| Parental lineage | ALE evolved population | ALE selection environment |
|------------------|------------------------|---------------------------|
| M3               | M3 (2,35)              | High Sugar                |
| E2               | E2 (26,37)             | High Sugar                |
| G11              | G11 (23,22)            | High Sugar                |
| M12              | M12 (18,23)            | High Sugar                |
| E9               | E9 (0,7)               | High Ethanol              |

**Appendix Table S5. ALE evolved populations for which glutathione levels were measured.**

| Parental lineage | ALE population evolved for improved glutathione use |
|------------------|-----------------------------------------------------|
| E6               | E6 (30,7)                                           |
|                  | E6 (31,30)                                          |
| G10              | G10 (19,18)                                         |
| T3               | T3 (15,35)                                          |
|                  | T3 (15,32)                                          |
| T5               | T5 (11,15)                                          |
| T4               | T4 (0,43)                                           |
|                  | T4 (0,19)                                           |
| E11              | E11 (22,31)                                         |
| G9               | G9 (13,1)                                           |
| T15              | T15 (10,19)                                         |
| M3               | M3 (1,35)                                           |
| G6               | G6 (1,36)                                           |



|     |             |
|-----|-------------|
| M4  | M4 (15,28)  |
| E7  | E7 (15,46)  |
| E5  | E5 (15,39)  |
| M7  | M7 (9,24)   |
| D12 | D12 (21,34) |

**Appendix Table S6. List and description of sequenced ALE populations**

| Name (x, y position on solid media) | Selection environment  |
|-------------------------------------|------------------------|
| T3 (15,35)                          | Glutathione production |
| T3 (15,32)                          | Glutathione production |
| M4 (15,28)                          | Glutathione production |
| M7 (9,24)                           | Glutathione production |
| M9 (21,0)                           | High Sugar             |
| E2 (26,37)                          | High Sugar             |
| F12 (6,31)                          | High Sugar             |
| G1 (30,13)                          | High Sugar             |
| G10 (16,17)                         | High Sugar             |
| M3 (0,33)                           | High Sugar             |
| M3 (2,35)                           | High Sugar             |
| M3 (1,34)                           | High Sugar             |
| T14 (16,15)                         | High Sugar             |
| E11 (21,4)                          | NCR relaxation         |
| G6 (0,37)                           | NCR relaxation         |
| M4 (14,5)                           | NCR relaxation         |
| M7 (11,24)                          | NCR relaxation         |
| T4 (3,41)                           | NCR relaxation         |
| T6 (5,10)                           | NCR relaxation         |
| M5 (4,43)                           | NCR relaxation         |
| E9 (0,7)                            | High EtOH              |
| G7 (30,45)                          | High EtOH              |
| M2 (13,40)                          | High EtOH              |
| T3 (12,35)                          | High EtOH              |
| T3 (13,35)                          | High EtOH              |
| T3 (15,35)                          | High EtOH              |



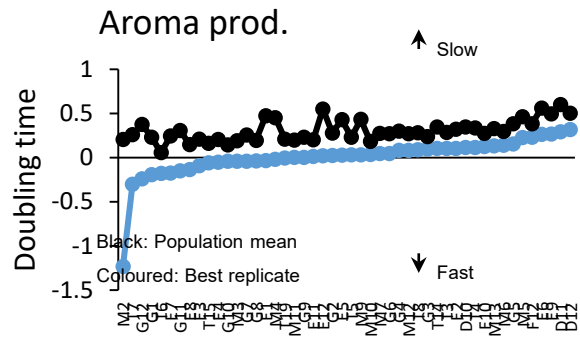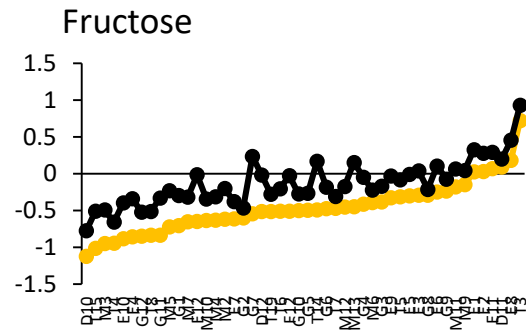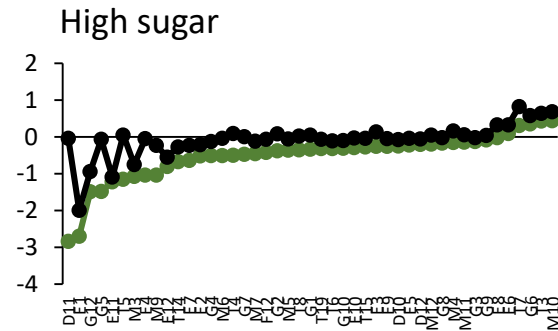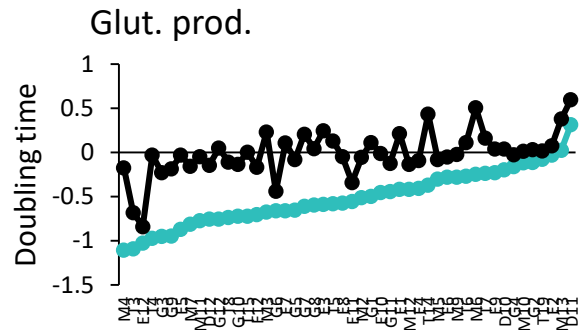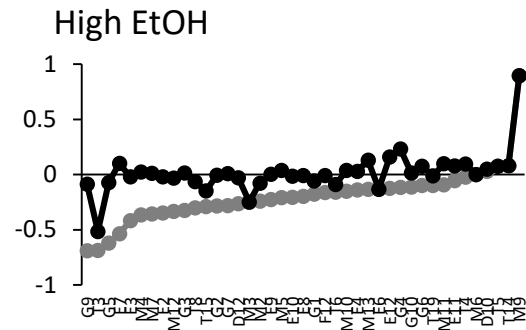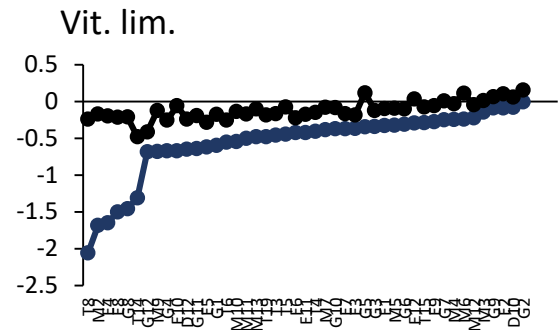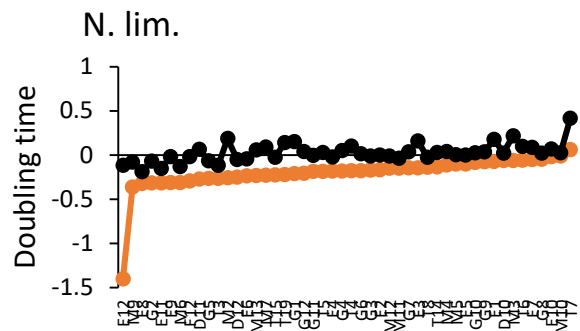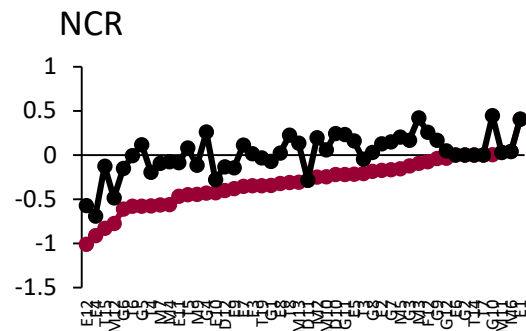

**Appendix Figure S2. Replication improves ALE adaptation outcomes.** Doubling time line chart of the best adapted replicate (coloured) and population mean (average of all replicates: black) of each lineage in each environment. Error bars = SEM ( $n=2-4$  for the best replicate and  $n=24$  for the population).

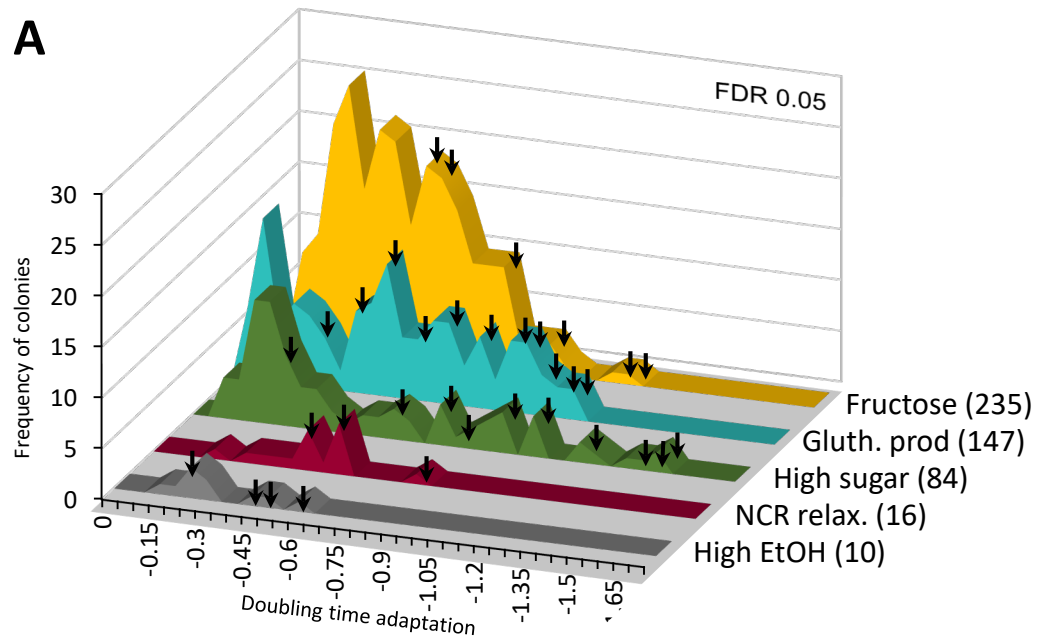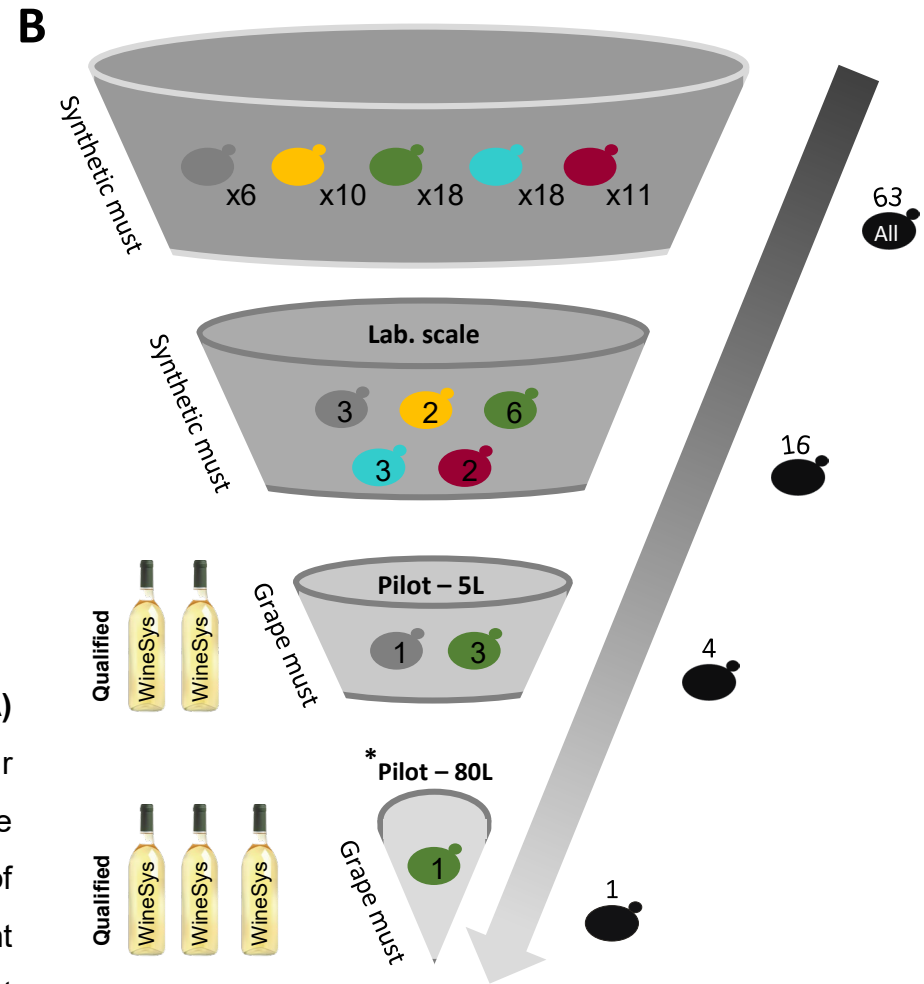

**Appendix Figure S3. Selecting ALE populations for larger culture validation. (A)** 3D histogram of adaptation of populations with shorter doubling time compared to their parents in selection regime (colour). Environments with little or no adaptation are excluded. Arrows: ALE populations selected for validation. In parenthesis: number of ALE populations with significantly different doubling times compared to the parent (FDR:  $q=0.05$ ). **(B)** Design of a stepwise scale-up for validation. Coloured yeast represents ALE selection environments. Numbers = number of populations tested.

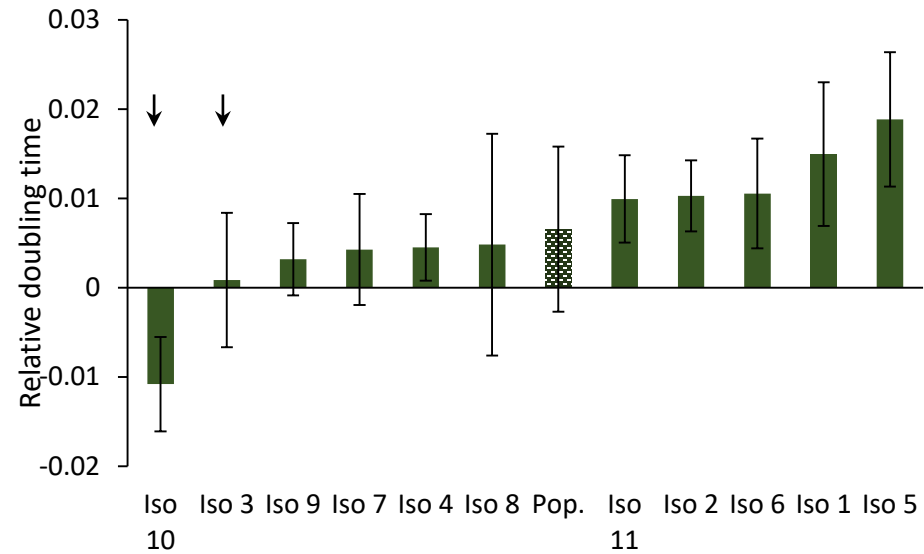

**Appendix Figure S4. Selecting clones for 80L scale-up experiments.** 11 clones (iso 1-11) were isolated from the high sugar adapted ALE population E2 (26, 37) (pop.) and clonally expanded (n=24) on synthetic grape must. Their  $\log_2$  doubling time normalized to that of the global control strain E2 is shown and compared to that of ALE population E2 (26, 37). Arrows:  $p < 0.05$  (one sided Student's t-test), error bars = S. d. Isolates 3 and 10 were selected for scale-up experiments in 80L grape must.

**Appendix Figure S5. High sugar adapted ALE clonal isolates ferment grape must well in larger liquid cultures.** We followed the capacity of clonal isolates from the high sugar adapted ALE population E2 (26, 37) and the parent E2 strain to ferment grape must in 80L cultures, by measuring the grape must density. The time-resolved grape must density is shown for isolates (iso) 3 and 12 and the corresponding parent strain cultivated in the same grape must.

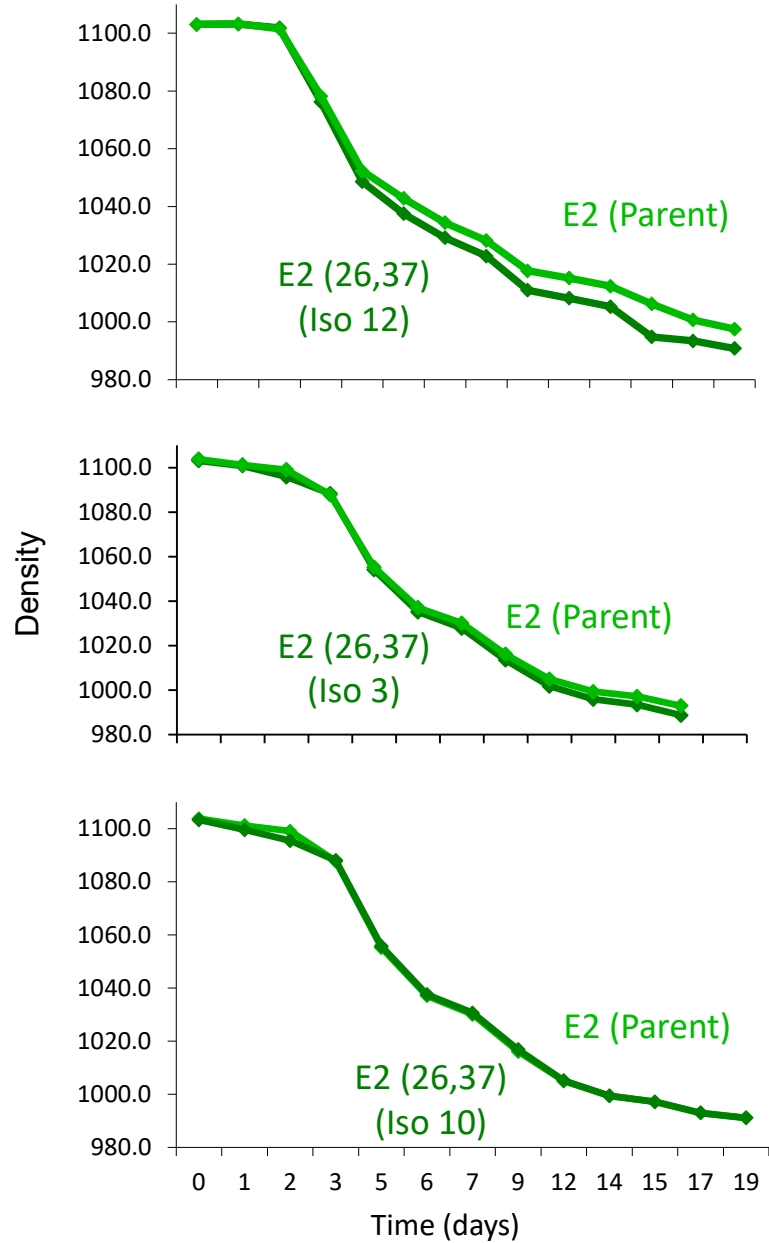

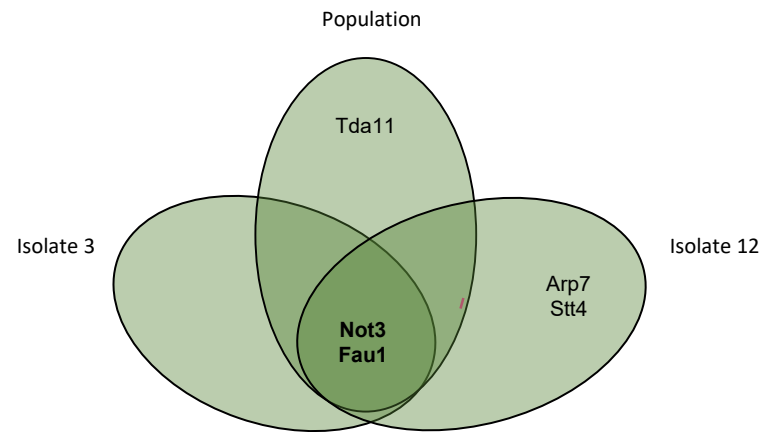

**Appendix Figure S6. Sequence variations in high sugar adapted ALE clones.** We sequenced the high sugar adapted ALE population E2 (26, 37) as well as isolates 3 and 12 from this population and called variants relative the E2 parent strain. The Venn diagram shows the genes containing called single nucleotide variants in the clones and in the high sugar adapted ALE population E2 (26, 37)..
